# Supplementary material for: Responsive polymer–fluorescent carbon nanoparticle hybrid nanogels for optical temperature sensing, near-infrared light-responsive drug release, and tumor cell imaging
Source: Royal Society of Chemistry journal article supplement (doi:10.1039/c4nr01030b), 2014-01-01
Supplement: c4nr01030b1.pdf [file c4nr01030b1.pdf]

# Responsive polymer-fluorescent carbon nanoparticle hybrid nanogels for optical temperature sensing, near-infrared light-responsive drug release, and tumor cell imaging

Hui Wang,<sup>a</sup> Fuyou Ke,<sup>a</sup> Anton Mararenko,<sup>a</sup> Zengyan Wei,<sup>b</sup> Probal Banerjee<sup>a</sup> and Shuiqin Zhou<sup>\*,a</sup>

<sup>a</sup>Department of Chemistry of The College of Staten Island and The Graduate Center, The City University of New York, Staten Island, NY 10314, USA

<sup>b</sup>Department of Chemistry and Biochemistry, Hunter College, The City University of New York, New York, NY 10065, USA

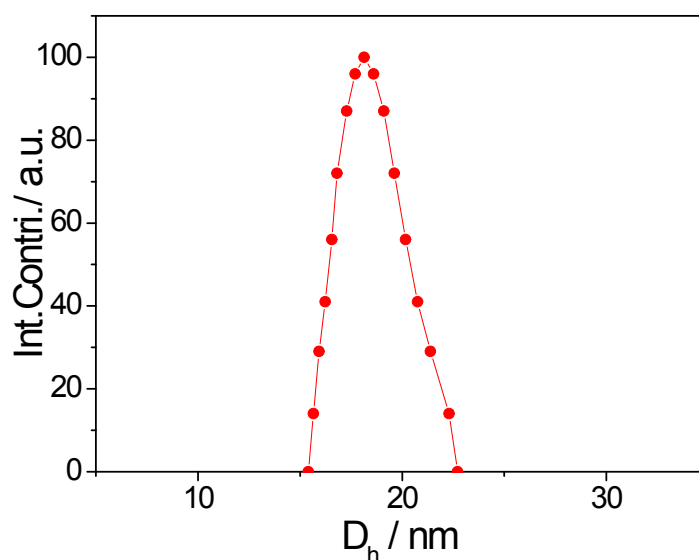

Figure S1. Hydrodynamic diameter distribution of FCNPs at a scattering angle  $\theta=60^\circ$  measure at 22 °C.

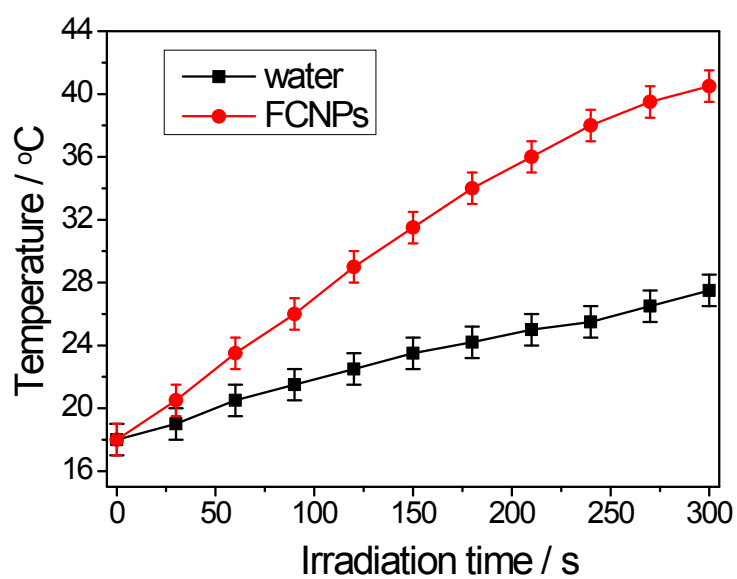

Figure S2. The heating curves of water and the FCNPs (100 mg/L) under NIR irradiation 1.5 W/cm<sup>2</sup>.

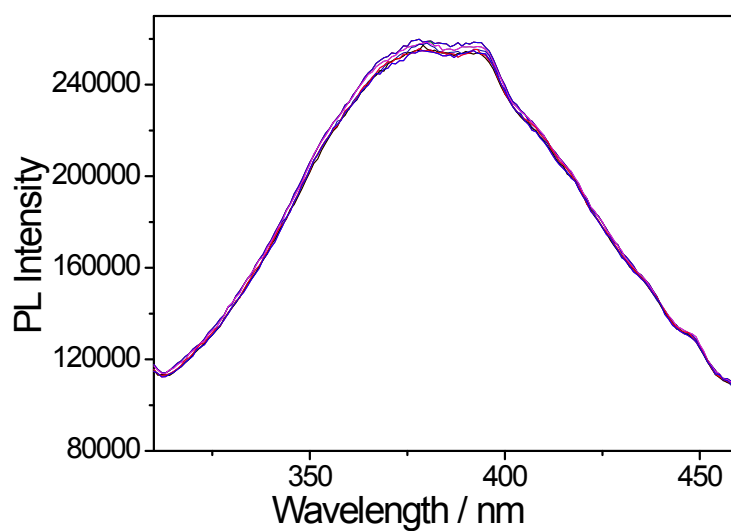

Figure S3. Fluorescence spectra ( $\lambda_{em}=380$  nm) of the hybrid nanogels under different excitation times from 0 min to 120 mins, excitation wavelength = 280 nm.

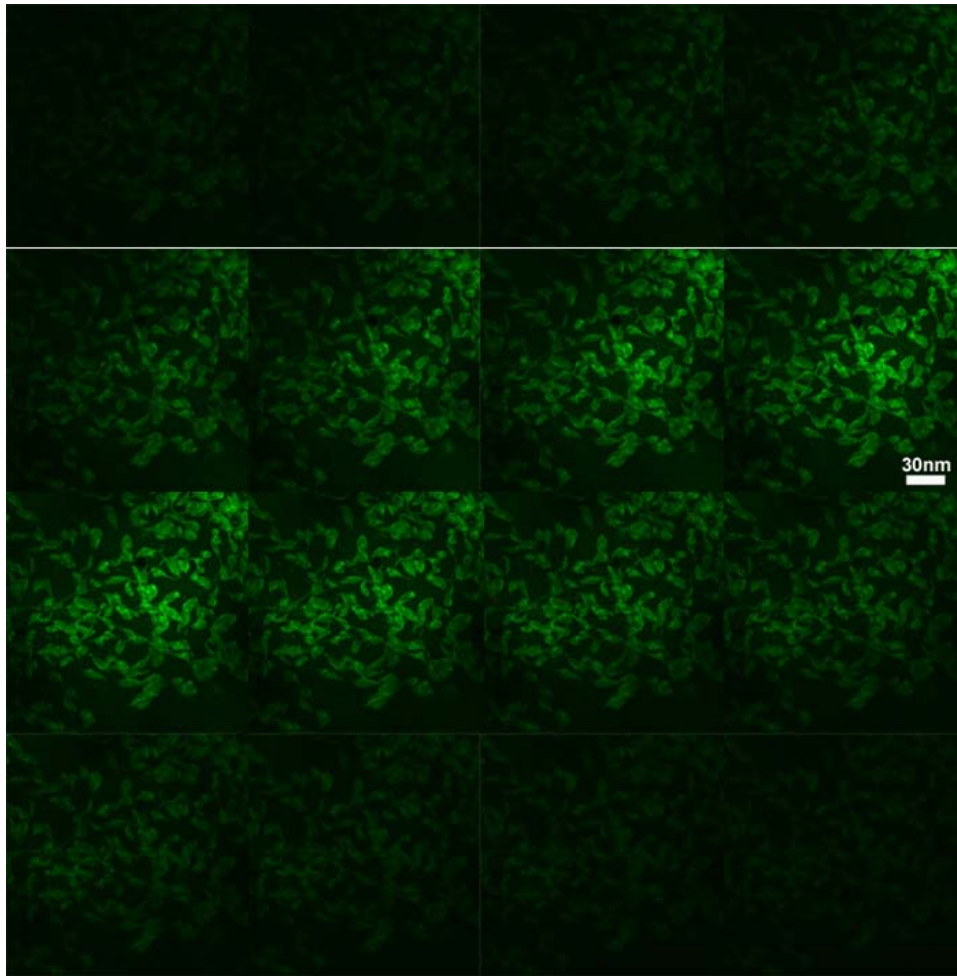

Figure S4. Z-Scanning confocal fluorescence images of the B16F10 cells incubated with the hybrid nanogels. Excitation wavelength = 405 nm.

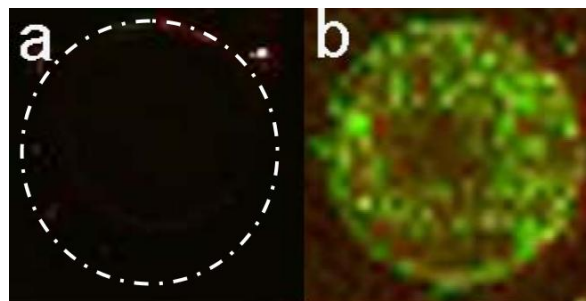

Figure S5. NIR scanner images of the round glass cover slips that are attached with B16F10 cells: (a) cells have no labels; and (b) cells incubated with the poly(NIPAM-AAm)-FCNP hybrid nanogels for 2h. The Odyssey CLx infrared imaging system with two diode lasers (wavelength

= 700 nm and 800 nm, respectively) as excitation light sources was used for the imaging.
